# Supplementary material
Source: publisher figshare collection journal article supplement (https://karger.figshare.com/ndownloader/files/18090524)
Supplement: Supplementary file 1 [file 18090524]

**Figure S1. Quality Control.** Plots of number of genes, UMIs, and the percentage of UMIs that derived from mitochondrial and ribosomal genome detected per single cell for male control (Upper), KS patient (Middle), and female control (Bottom).

**Figure S2. Differential expression genes between KS and female control at NK cell, T cell, dendritic cell.**

Heatmap showing the expression pattern of differentially expressed genes (DEGs) between the 3 immune cell types (including T cell, natural killer cell, and dendritic cell) in KS and female control (Red = high expression; purple = low expression).

**Figure S3. The typical differential expression genes**

(a) Violin plots show the typical differentially expressed genes at T cell, NK cell and dendritic cell between KS and both controls. (b) RT-qPCR confirmed the typical differentially expressed genes of PBMCs. The results were normalized with GAPDH, using the 2‑ΔΔCq method. Columns represent as the mean ± standard deviation. All tests: Mann-Withney-U-Test. Significance levels: ***P<0.001, **P<0.01, *P<0.05.
